# Supplementary material for: Toxic Effects Produced by Anatoxin-a under Laboratory Conditions: A Review
Source: MDPI journal article supplement (doi:10.3390/toxins14120861), 2022-12-08
Supplement: s1 [file s1]

# Supplementary Materials: Toxic Effects Produced by Anatoxin-a Under Laboratory Conditions: A Review

Cristina Plata-Calzado, Ana I. Prieto, Ana M. Cameán and Ángeles Jos

**Table S1.** Risk of bias for the methodological quality of studies reporting the toxic effects produced by ATX--a under laboratory conditions. 0: not reported; 1: not appropriately or clearly evaluated; 2: appropriately evaluated. M: medium (4-6); L: low (7-8); H: high (0-3).

| Reference | Clear objective | Well characterized product | Reproducibility of the assay | Adequate statistical analysis | Total | Risk of Bias |
|-----------|-----------------|----------------------------|------------------------------|-------------------------------|-------|--------------|
| [4]       | 2               | 2                          | 1                            | 0                             | 5     | M            |
| [28]      | 2               | 2                          | 1                            | 2                             | 7     | L            |
| [29]      | 2               | 2                          | 1                            | 0                             | 5     | M            |
| [30]      | 2               | 2                          | 2                            | 2                             | 8     | L            |
| [43]      | 2               | 2                          | 1                            | 0                             | 5     | M            |
| [44]      | 2               | 1                          | 1                            | 0                             | 4     | M            |
| [45]      | 2               | 1                          | 1                            | 0                             | 4     | M            |
| [46]      | 2               | 1                          | 1                            | 0                             | 4     | M            |
| [47]      | 1               | 1                          | 1                            | 0                             | 3     | H            |
| [48]      | 2               | 2                          | 2                            | 0                             | 6     | M            |
| [49]      | 2               | 2                          | 1                            | 2                             | 7     | L            |
| [50]      | 2               | 2                          | 1                            | 0                             | 5     | M            |
| [51]      | 2               | 2                          | 1                            | 2                             | 7     | L            |
| [52]      | 2               | 2                          | 2                            | 2                             | 8     | L            |
| [53]      | 2               | 2                          | 2                            | 2                             | 8     | L            |
| [54]      | 2               | 2                          | 2                            | 2                             | 8     | L            |
| [55]      | 2               | 2                          | 2                            | 2                             | 8     | L            |
| [56]      | 2               | 2                          | 2                            | 2                             | 8     | L            |
| [57]      | 2               | 2                          | 2                            | 2                             | 8     | L            |
| [58]      | 2               | 2                          | 2                            | 2                             | 8     | L            |
| [59]      | 2               | 2                          | 2                            | 2                             | 8     | L            |
| [60]      | 2               | 2                          | 2                            | 2                             | 8     | L            |
| [61]      | 2               | 2                          | 2                            | 2                             | 8     | L            |
| [62]      | 2               | 2                          | 2                            | 2                             | 8     | L            |
| [63]      | 2               | 2                          | 2                            | 2                             | 8     | L            |
| [64]      | 2               | 2                          | 2                            | 2                             | 8     | L            |
| [68]      | 1               | 1                          | 1                            | 0                             | 3     | H            |
| [69]      | 1               | 1                          | 1                            | 0                             | 3     | H            |
| [70]      | 2               | 2                          | 1                            | 0                             | 5     | M            |
| [71]      | 2               | 1                          | 1                            | 0                             | 4     | M            |
| [72]      | 1               | 2                          | 1                            | 2                             | 6     | M            |
| [73]      | 2               | 2                          | 2                            | 2                             | 8     | L            |
| [74]      | 2               | 2                          | 1                            | 0                             | 5     | M            |
| [75]      | 2               | 2                          | 2                            | 2                             | 8     | L            |
| [76]      | 2               | 2                          | 2                            | 0                             | 6     | M            |
| [77]      | 2               | 2                          | 2                            | 2                             | 8     | L            |
| [78]      | 2               | 2                          | 2                            | 2                             | 8     | L            |
| [79]      | 2               | 2                          | 2                            | 2                             | 8     | L            |

|       |   |   |   |   |   |   |
|-------|---|---|---|---|---|---|
| [80]  | 2 | 2 | 2 | 2 | 8 | L |
| [81]  | 1 | 1 | 1 | 0 | 3 | H |
| [82]  | 2 | 1 | 1 | 0 | 4 | M |
| [83]  | 2 | 1 | 1 | 2 | 6 | M |
| [84]  | 2 | 1 | 1 | 2 | 6 | M |
| [85]  | 2 | 2 | 1 | 0 | 5 | M |
| [86]  | 2 | 2 | 1 | 2 | 8 | L |
| [87]  | 2 | 2 | 1 | 2 | 7 | L |
| [88]  | 2 | 2 | 2 | 2 | 8 | L |
| [89]  | 2 | 2 | 2 | 2 | 8 | L |
| [90]  | 2 | 2 | 2 | 2 | 8 | L |
| [91]  | 2 | 2 | 2 | 2 | 8 | L |
| [92]  | 2 | 2 | 2 | 2 | 8 | L |
| [93]  | 2 | 2 | 2 | 2 | 8 | L |
| [97]  | 2 | 1 | 1 | 2 | 6 | M |
| [98]  | 2 | 2 | 2 | 2 | 8 | L |
| [99]  | 2 | 2 | 2 | 2 | 8 | L |
| [100] | 2 | 2 | 2 | 2 | 8 | L |
| [101] | 2 | 2 | 2 | 2 | 8 | L |
